# Supplementary material for: Predominant role of interferon-γ in the host protective effect of CD8+ T cells against Neospora caninum infection
Source: Sci Rep. 2015 Oct 9;5:14913. doi: 10.1038/srep14913 (PMC4598874; doi:10.1038/srep14913)
Supplement: Supplementary Information [file srep14913-s1.pdf]

## **Predominant role of interferon- $\gamma$ in the host protective effect of CD8<sup>+</sup> T cells against *Neospora caninum* infection**

Alexandra Correia<sup>a</sup>, Pedro Ferreira<sup>a,b</sup>, Sofia Botelho<sup>b</sup>, Ana Belinha<sup>b</sup>, Catarina Leitão<sup>a</sup>, Íris Caramalho<sup>c</sup>, Luzia Teixeira<sup>b,d</sup>, África González-Fernández<sup>e</sup>, Rui Appelberg<sup>a,b</sup>, Manuel Vilanova<sup>a,b\*</sup>

Instituto de Investigação e Inovação em Saúde, Universidade do Porto, and IBMC - Instituto de Biologia Molecular e Celular, Universidade do Porto, 4150-180 Porto, Portugal<sup>a</sup>; ICBAS - Instituto de Ciências Biomédicas de Abel Salazar, Universidade do Porto, 4050-313 Porto, Portugal<sup>b</sup>; Instituto de Medicina Molecular, Faculdade de Medicina, Universidade de Lisboa, 1649-028 Lisboa, Portugal<sup>c</sup>; UMIB-Unidade Multidisciplinar de Investigação Biomédica, Universidade do Porto, Porto<sup>d</sup> Inmunología, Centro de Investigaciones Biomédicas (CINBIO), Instituto de Investigación Biomédica, Universidade de Vigo, Campus Lagoas Marcosende, E-36200 Vigo, Spain<sup>e</sup>.

\* vilanova@icbas.up.pt

**Supplementary Figure S1: CD4<sup>+</sup> T cells are activated and expand in the spleen of *N. caninum*-infected C57BL/6 WT mice**

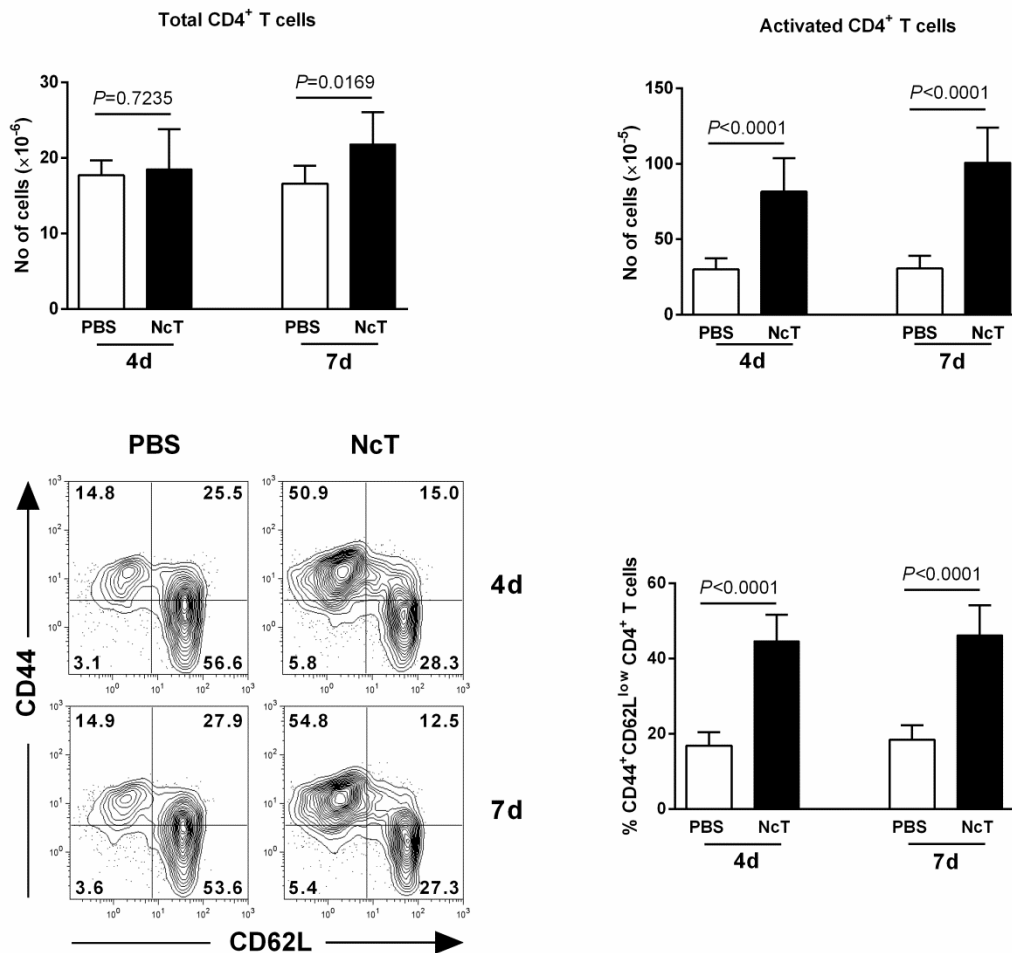

Numbers of total and activated (CD44<sup>+</sup>CD62L<sup>low</sup>) CD4<sup>+</sup> T cells, and percentage of activated CD4<sup>+</sup> T cells, as indicated, detected in the spleen of C57BL/6 mice infected i.p. with  $1 \times 10^7$  *N. caninum* tachyzoites (NcT), or sham-infected injected i.p. with PBS alone (PBS), 4 and 7 days upon the parasitic challenge.. Bars represent means plus one SD of pooled data from two independent experiments (n=6 and n=9 for control and infected groups, respectively). Unpaired two-tailed t-test was used to compare parasite-inoculated vs respective control mouse groups. Statistical significance between infected mice and controls is indicated above bars. Contour plots correspond to a representative example of CD4-gated T cells of the analysed samples. Quadrants and regions were set according to isotype control-stained samples. Numbers within contour plots correspond to the percentage of cells in each quadrant.

**Supplementary Figure S2: CD8-deficient mice are more susceptible to long-term *N. caninum* infection than control WT mice**

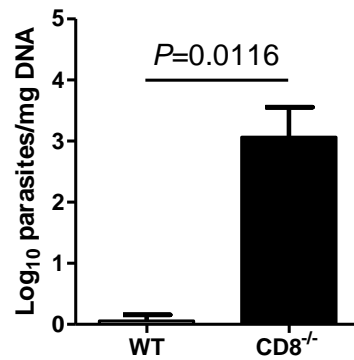

Parasitic load of brain tissue assessed by qPCR specific for *N. caninum* DNA in WT or *CD8a*<sup>-/-</sup> mice, as indicated, 40 days after i.p. inoculation of  $1 \times 10^7$  NcT. Bars represent means plus one SD of pooled data from two independent experiments (n=6 per group). Statistical significance between infected mice and controls is indicated above bars.

**Supplementary Figure S3: CD8<sup>+</sup> T cells are activated and produce IFN- $\gamma$  in *N. caninum*-infected C57BL/10 ScSn mice**

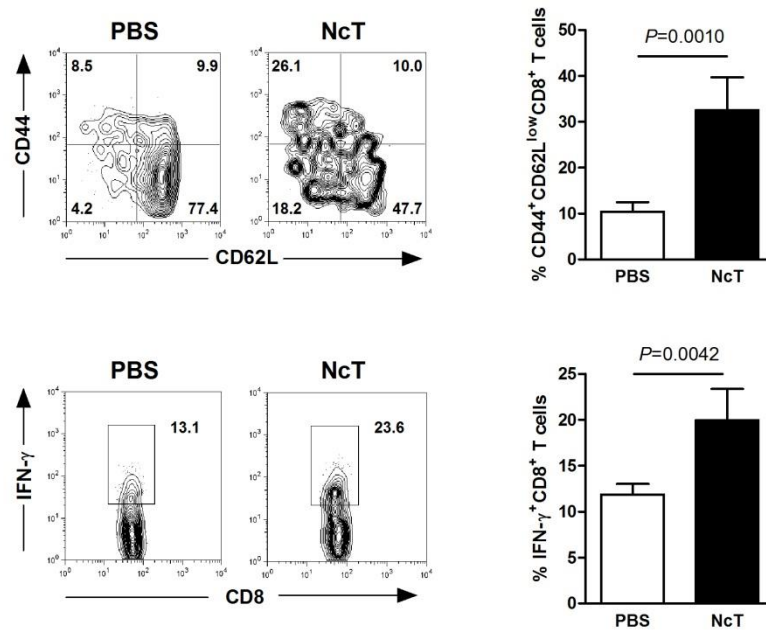

Proportions of activated (CD44<sup>+</sup>CD62L<sup>low</sup>) and of IFN- $\gamma$ <sup>+</sup> CD8<sup>+</sup> T cells, as indicated, detected in the spleen of ScSn mice 7 days upon infection i.p. with  $1 \times 10^7$  NcT (NcT) or sham-infection with PBS alone (PBS). Bars represent means plus one SD of four mice per group. Unpaired two-tailed t-test was used to compare parasite-inoculated vs respective control mouse groups. Statistical significance between infected mice and controls is indicated above bars. Contour plots correspond to a representative example of CD8-gated T cells of the analysed samples. Quadrants and regions inside contour plots were set according to isotype control-stained samples. Numbers within contour plots correspond to the percentage of cells in each quadrant or region.

**Supplementary Figure S4: IFN- $\gamma$  and TNF- $\alpha$  expression in *in vitro* stimulated splenic CD4<sup>+</sup> T cells of *N. caninum* infected mice and controls**

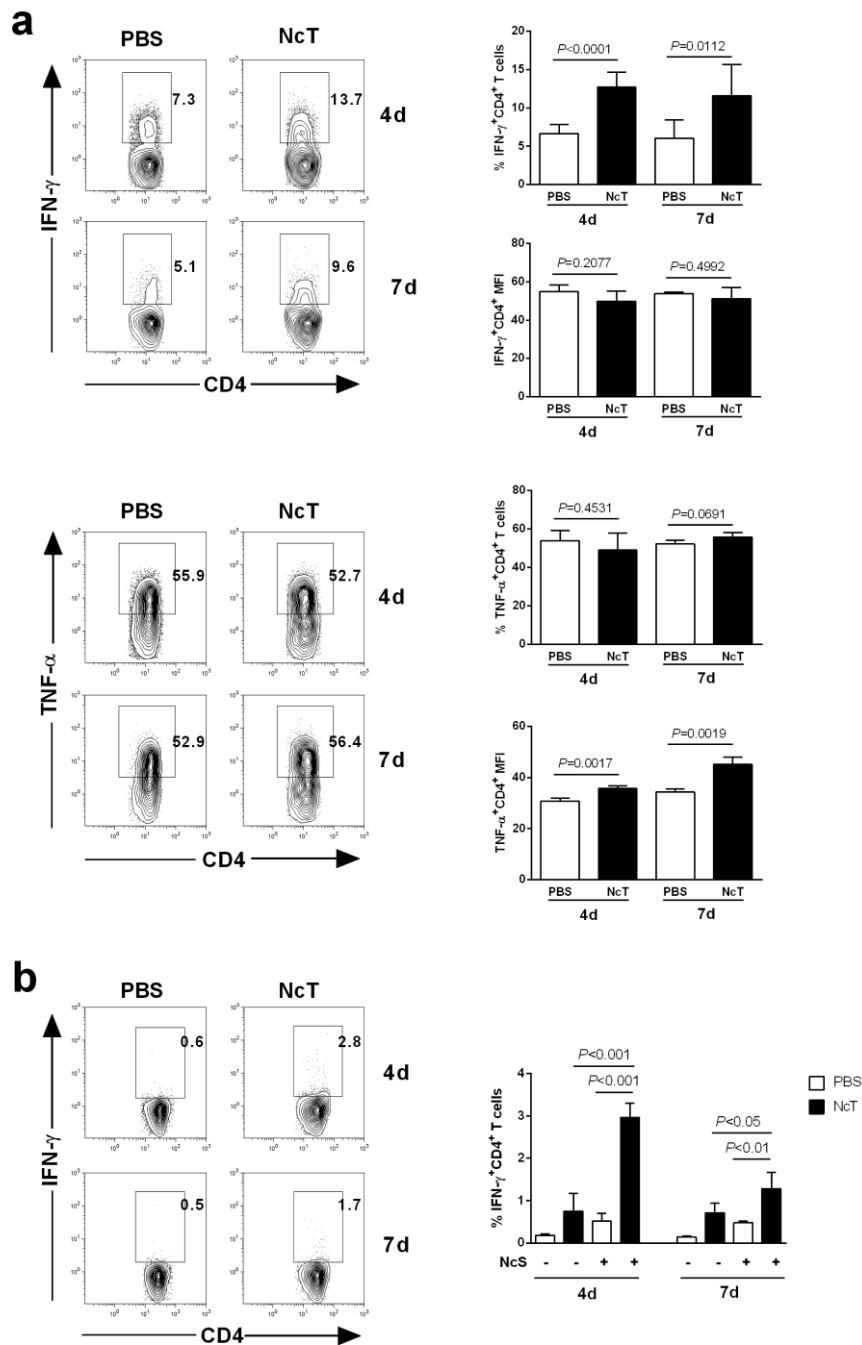

(a) Percentage of splenic CD4-gated T cells expressing IFN- $\gamma$  or TNF- $\alpha$  of  $1 \times 10^7$  NcT-infected mice (NcT) and sham-infected controls (PBS), detected by intracellular staining after stimulation with PMA/ionomycin. Mean fluorescence intensities (MFI) due to respective cytokine staining are also presented. Bars represent means plus one SD of pooled data from two independent

experiments (n=6 for controls and n=9 for infected mice). Statistical significance between infected mice and controls is indicated above bars. (b) Percentage of IFN- $\gamma$ <sup>+</sup> cells on total CD4<sup>+</sup> T cells of infected mice (NcT) and controls (PBS) detected in *in vitro* splenocytes cultures non stimulated (-) or stimulated for 16 h with *N. caninum* sonicates (+); n=5 and n=7 for non-stimulated and stimulated groups, respectively. Contour plots correspond to a representative example of stimulated CD4-gated T cells of the analysed samples. Analysis regions were set according to isotype control-stained samples. Numbers within contour plots correspond to the percentage of cells in the region shown.

**Supplementary Figure S5: Proportions of IFN- $\gamma$ -expressing CD4<sup>+</sup> T cells in *CD8a*<sup>-/-</sup> mice infected with *N. caninum*.**

**a**

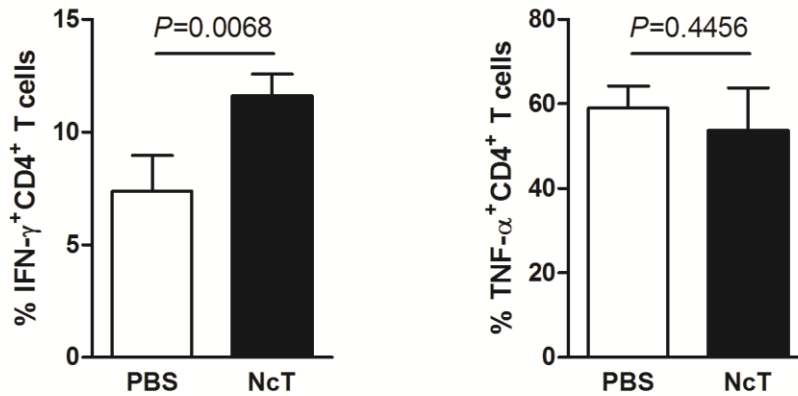

**b**

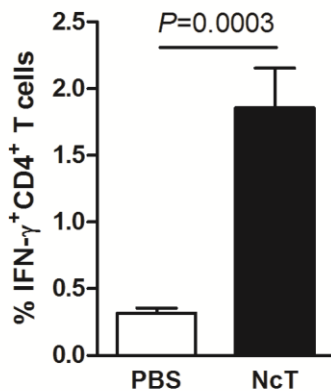

(a) Percentage of CD4-gated T cells expressing IFN- $\gamma$  or TNF- $\alpha$  in the spleen of *N. caninum* i.p. infected *CD8a*<sup>-/-</sup> mice (NcT) and sham-infected controls (PBS), detected by intracellular staining after stimulation with PMA/ionomycin 7 days upon the parasitic challenge. (b) Percentage of CD4-gated T cells expressing IFN- $\gamma$  detected in spleen cell cultures of 7-day infected *CD8a*<sup>-/-</sup> mice (NcT) and sham-infected controls (PBS), after 16 h *N. caninum* antigen-stimulation. Bars represent the mean plus one SD (n=3 for controls and n=4 for infected mice). Statistical significance between infected mice and controls is indicated above bars.

**Supplementary Figure S6: Parasitic load in *N. caninum*-infected C57BL/6 WT, *p47phox*<sup>-/-</sup> and *Nos2*<sup>-/-</sup> mice**

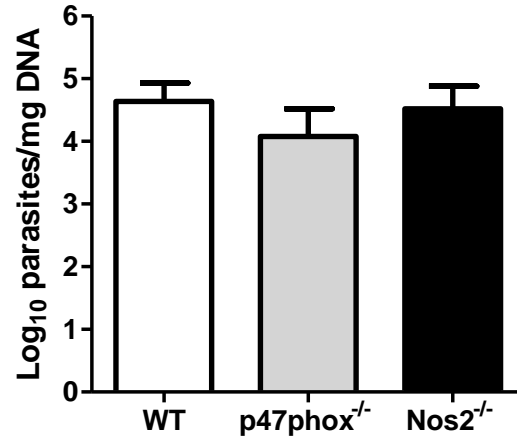

Parasitic load of brain tissue assessed by qPCR specific for *N. caninum* DNA in C57BL/6 WT (n=10), *p47phox*<sup>-/-</sup> (n=9) and *Nos2*<sup>-/-</sup> (n=8) mice, as indicated, 30 days after i.p. inoculation with  $1 \times 10^7$  *N. caninum* tachyzoites. Bars represent means plus one SD. No statistically significant differences were observed among the different infected mouse groups (One-way ANOVA and Tukey's *post-hoc* test).

**Supplementary Figure S7: Expression of inducible nitric oxide synthase (*Nos2*) mRNA in infected and control B6 WT and *CD8a*<sup>-/-</sup> mice**

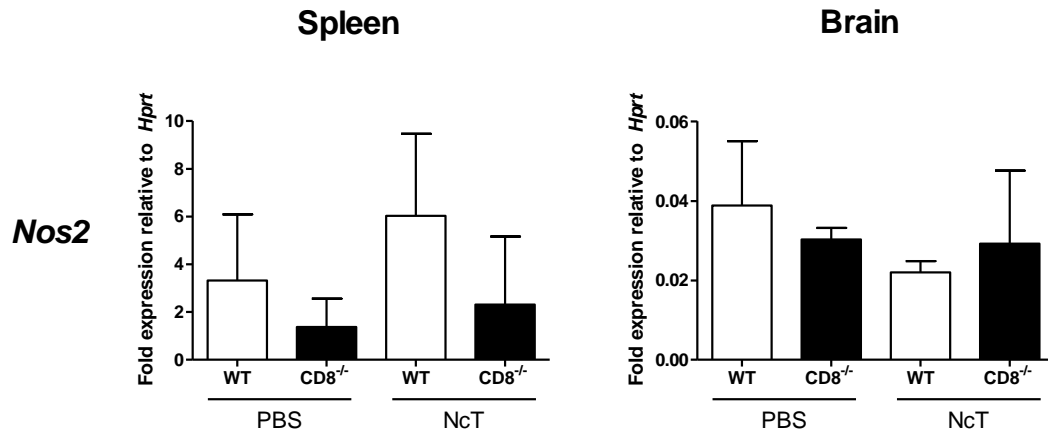

Relative levels of *Nos2* mRNA, normalized to hypoxanthine guanine phosphoribosyl transferase (*Hprt*) mRNA, detected by real-time PCR in the spleen and brain of WT and *CD8a*<sup>-/-</sup> mice, as indicated, 7 days after i.p. injection of  $1 \times 10^7$  *N. caninum* tachyzoites (NcT; n=4) or PBS (PBS; n=3). Bars represent mean values of the respective group plus one SD. No statistical significant differences were observed among mouse groups (one-way ANOVA and Tukey's post-hoc test).

**Supplementary Figure S8: *Rag2*<sup>-/-</sup> mice are lethally susceptible to *N. caninum* infection**

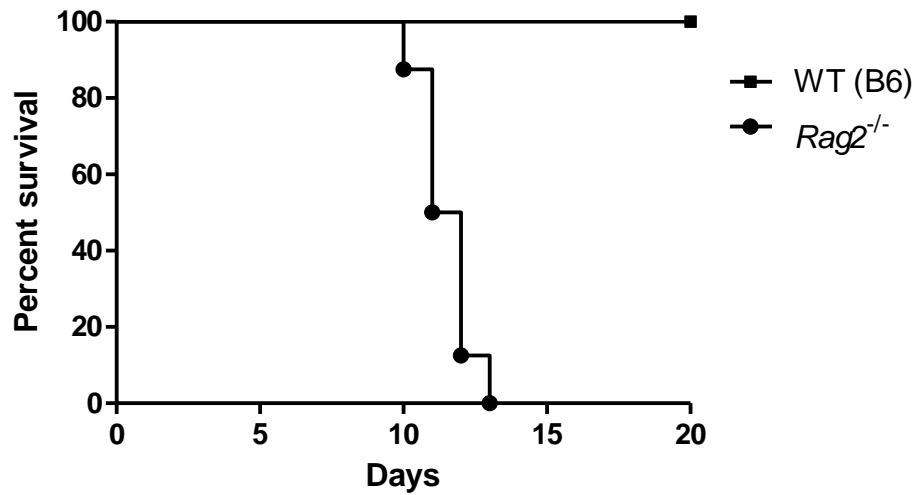

Survival of C57BL/6 WT (n=10) and *Rag2*<sup>-/-</sup> (n=10) mice infected i.p. with  $1 \times 10^7$  *N. caninum* tachyzoites. Statistical difference between mouse groups was calculated with the log-Rank test ( $P < 0.001$ ).

**Supplementary Figure S9: Expression of IFN- $\gamma$  by splenic T cells of *N. caninum* infected C57BL/6 WT and *Prf1*<sup>-/-</sup> mice**

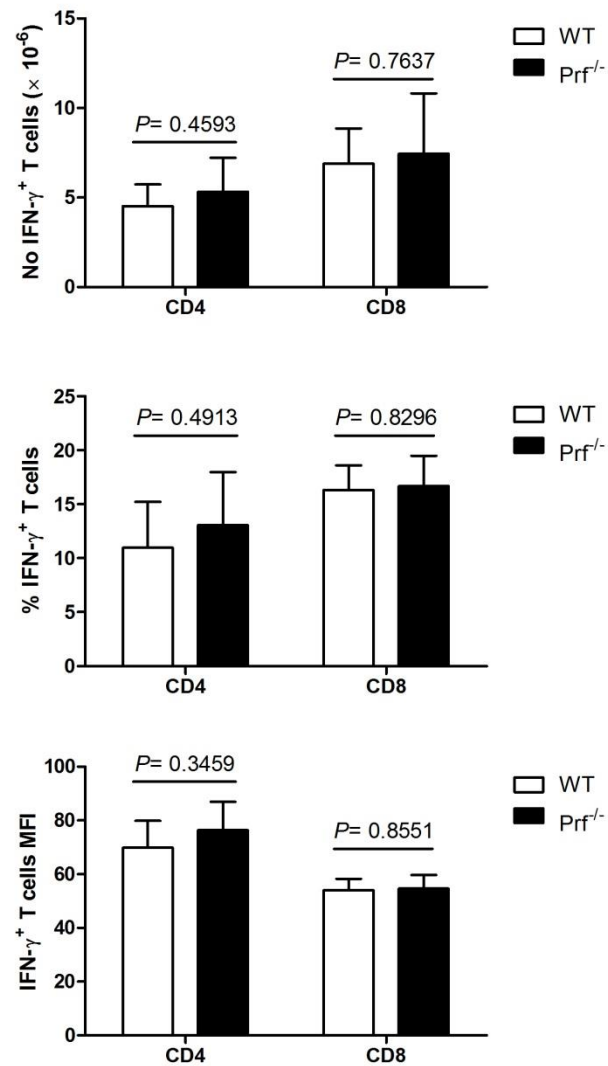

Numbers, proportions and MFI due to IFN- $\gamma$  staining of IFN- $\gamma$ -producing CD4<sup>+</sup> and CD8<sup>+</sup> T cells, as indicated, detected in the spleen of WT and *Prf1*<sup>-/-</sup> mice 7 days upon infection with  $1 \times 10^7$  *N. caninum* tachyzoites. Bars represent means plus one SD of five mice per group. Statistical significances between mouse groups are indicated above bars.

**Supplementary Table S1: Reconstitution of *Rag2*<sup>-/-</sup> mice**

Relative proportions and total numbers of CD4<sup>+</sup> and CD8<sup>+</sup> T cells detected by flow cytometry in the spleen of 7-day *N. caninum* infected *Rag2*<sup>-/-</sup> mice reconstituted 28 days prior to infection with 1.5×10<sup>6</sup> WT CD4<sup>+</sup> T cells and equal numbers of either WT or *Ifng*<sup>-/-</sup> CD8<sup>+</sup> T cells, as indicated.

| Individual mouse number | <i>IFNG</i> gene status in CD8 <sup>+</sup> T cells | CD4 <sup>+</sup> T cells |                         | CD8 <sup>+</sup> T cells |                         |
|-------------------------|-----------------------------------------------------|--------------------------|-------------------------|--------------------------|-------------------------|
|                         |                                                     | %                        | total number (millions) | %                        | total number (millions) |
| #1                      | -/-                                                 | 80,07                    | 12,35                   | 19,93                    | 3,07                    |
| #2                      | -/-                                                 | 86,46                    | 19,82                   | 13,54                    | 3,10                    |
| #3                      | -/-                                                 | 93,45                    | 18,54                   | 6,55                     | 1,30                    |
| #4                      | -/-                                                 | 83,38                    | 18,23                   | 16,62                    | 3,63                    |
| #5                      | -/-                                                 | 83,70                    | 21,46                   | 16,30                    | 4,18                    |
| #6                      | -/-                                                 | 78,68                    | 33,30                   | 21,32                    | 9,02                    |
| #7                      | -/-                                                 | 77,65                    | 46,79                   | 22,35                    | 13,47                   |
| #8                      | -/-                                                 | 90,13                    | 24,53                   | 9,87                     | 2,69                    |
| #9                      | -/-                                                 | 88,57                    | 31,10                   | 11,43                    | 4,01                    |
| #10                     | -/-                                                 | 78,93                    | 13,31                   | 21,07                    | 3,55                    |
| #11                     | +/+                                                 | 82,45                    | 34,89                   | 17,55                    | 7,43                    |
| #12                     | +/+                                                 | 60,98                    | 38,04                   | 39,02                    | 24,34                   |
| #13                     | +/+                                                 | 7,26                     | 3,53                    | 92,74                    | 45,05                   |
| #14                     | +/+                                                 | 74,22                    | 37,33                   | 25,78                    | 12,97                   |
| #15                     | +/+                                                 | 74,85                    | 44,02                   | 25,15                    | 14,79                   |
| #16                     | +/+                                                 | 80,69                    | 43,86                   | 19,31                    | 10,49                   |
| #17                     | +/+                                                 | 72,21                    | 39,36                   | 27,79                    | 15,15                   |
| #18                     | +/+                                                 | 62,35                    | 48,19                   | 37,65                    | 29,10                   |
| #19                     | +/+                                                 | 76,88                    | 26,86                   | 23,12                    | 8,08                    |
| #20                     | +/+                                                 | 85,22                    | 10,48                   | 14,78                    | 1,82                    |
